# Supplementary material
Source: publisher site journal article supplement (https://www.spandidos-publications.com/1958/downloadSupplementary)

Figure S1. Effects of the THP-1- and PHM-derived exosomes on cell cycle regulation in OSC-4 cells. OSC-4 cells were incubated with 50  $\mu\text{g/ml}$  THP-1- and PHM-derived exosomes for 24 h in the presence or absence of 100  $\mu\text{M}$  5-FU or CDDP, and cell cycle status was evaluated using flow cytometry after the indicated treatments. 5-FU, 5-fluorouracil; CDDP, *cis*-diamminedichloro-platinum; Cont, control; PHM, primary human macrophages.

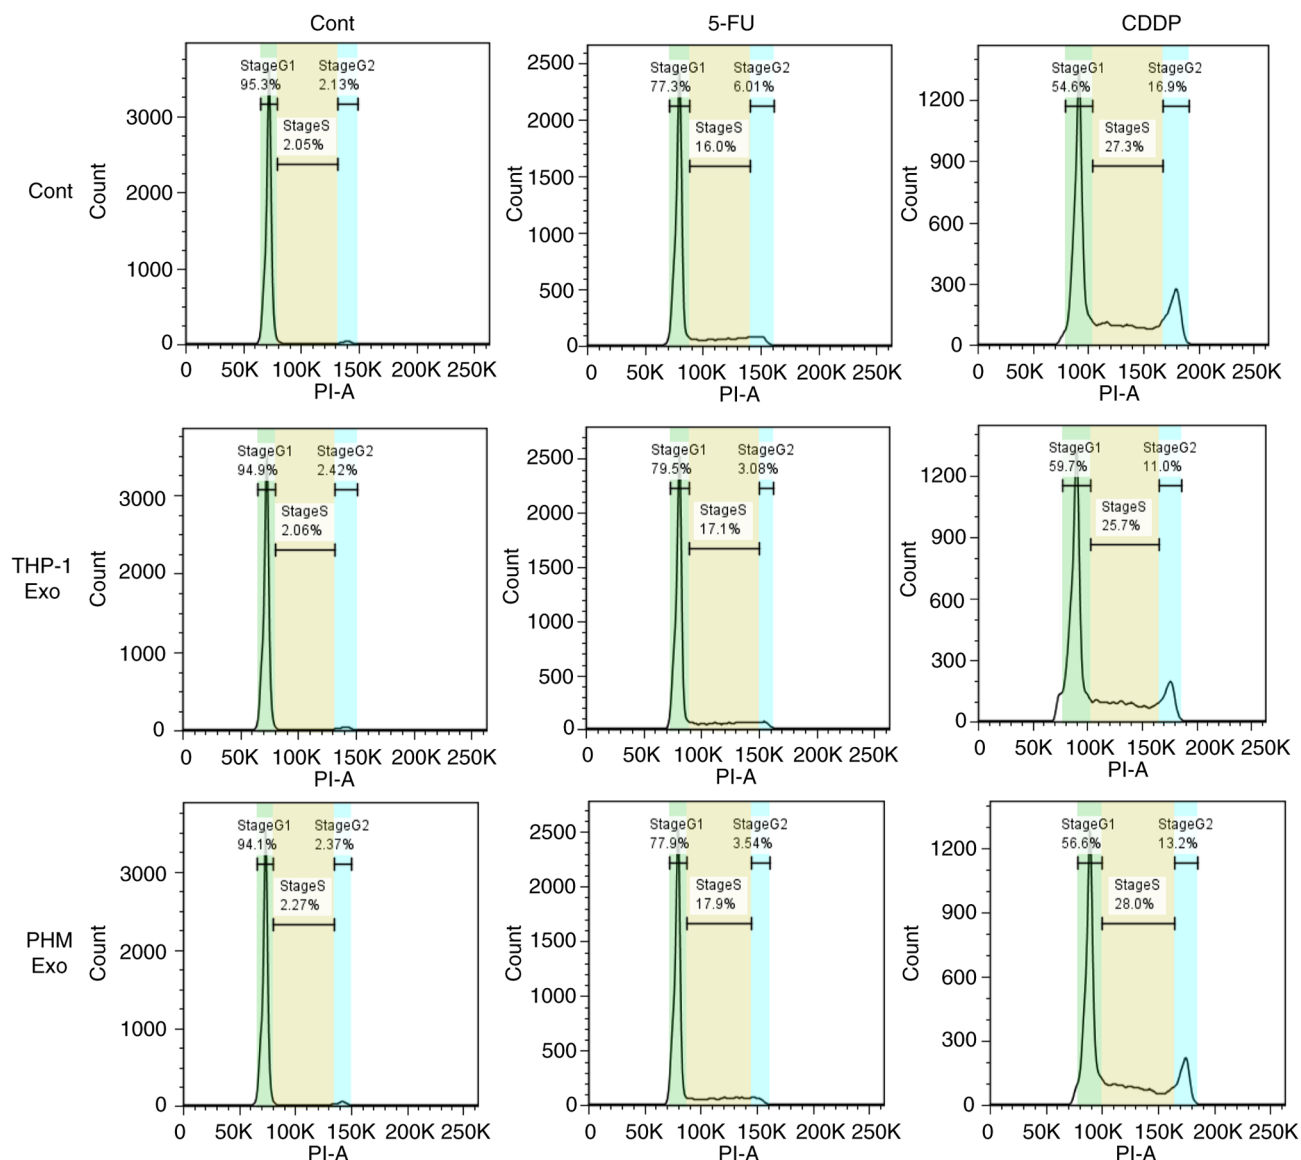

Figure S2. Effects of the THP-1- and PHM-derived Exo on apoptosis in OSC-4 cells. OSC-4 cells were incubated with 50  $\mu\text{g}/\text{ml}$  THP-1- and PHM-derived Exo for 24 h in the presence or absence of 100  $\mu\text{M}$  5-FU or CDDP, and apoptosis was evaluated using flow cytometry after the indicated treatments. 5-FU, 5-fluorouracil; CDDP, *cis*-diamminedichloroplatinum; Cont, control; Exo, exosomes; PHM, primary human macrophages.

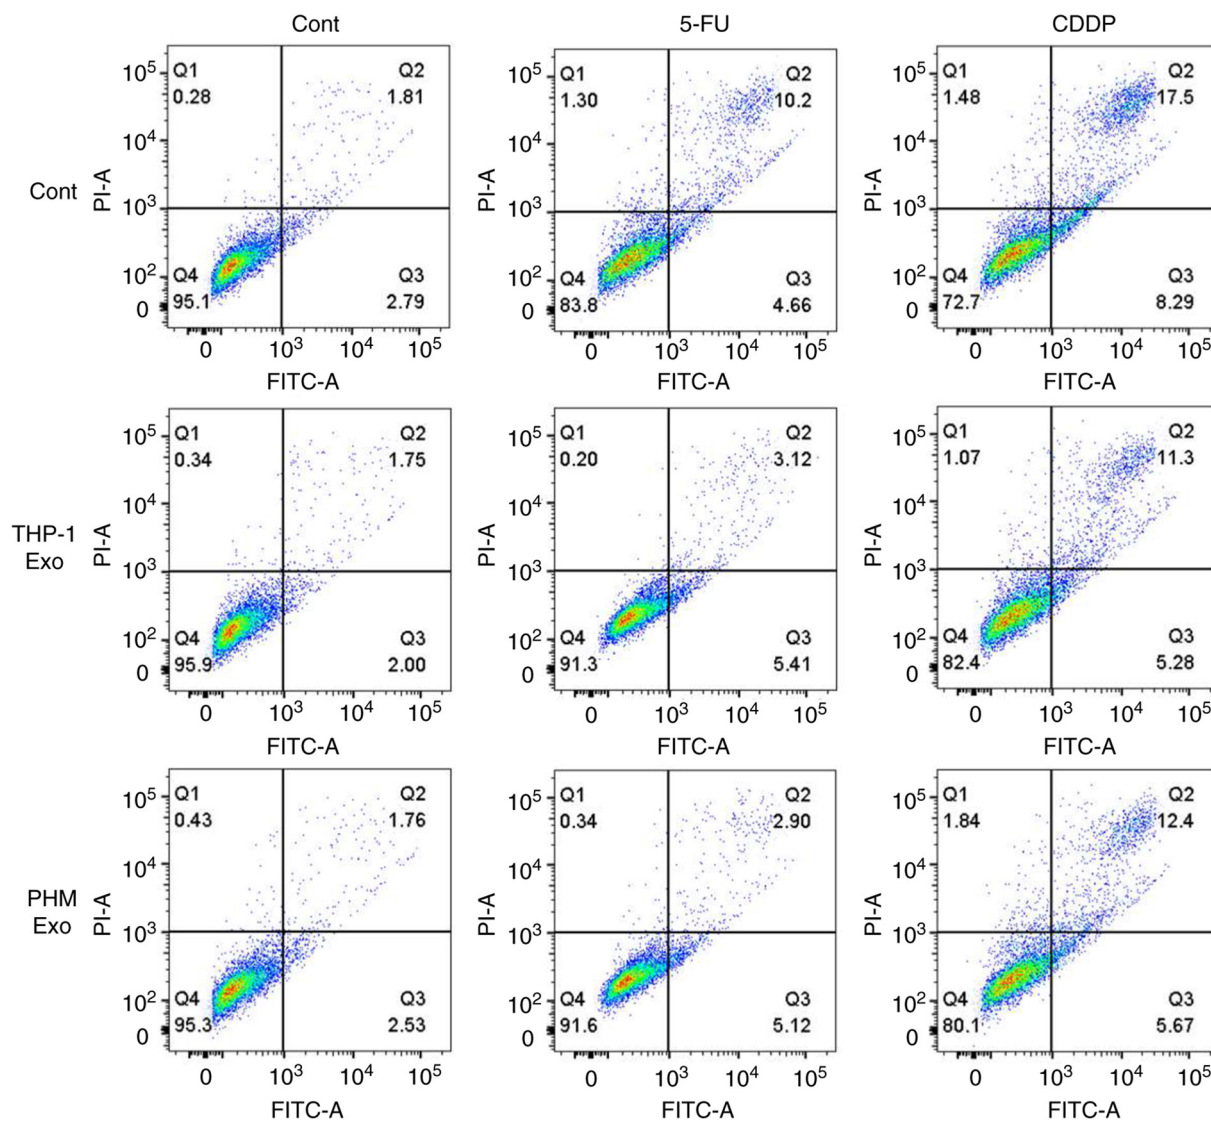

Supplement: Supplementary file 1 [file downloadSupplementary]
